# Supplementary material
Source: publisher figshare collection journal article supplement (https://sage.figshare.com/ndownloader/files/16236296)
Supplement: Supplementary file 1 [file 16236296]

## Appendix B: Sample Scoring Sheet

### Operationalizing Plan Quality Characteristics/Indicator Descriptions/Codebook

| Indicator                                                                                                                                                                                                                 | Description                                                                                                                                                                                                                                                                    | Jurisdiction | Comments                                                                  |  |
|---------------------------------------------------------------------------------------------------------------------------------------------------------------------------------------------------------------------------|--------------------------------------------------------------------------------------------------------------------------------------------------------------------------------------------------------------------------------------------------------------------------------|--------------|---------------------------------------------------------------------------|--|
| <b>Coding Categories:</b><br>0 = Not identified<br>1 = Identified by vague<br>2 = Identified and clear                                                                                                                    |                                                                                                                                                                                                                                                                                |              |                                                                           |  |
| <b>Fact Base:</b> Description of the current and future state of the municipality in terms of population, economy, land uses, land supply, community facilities and infrastructure, and state of the natural environment. |                                                                                                                                                                                                                                                                                |              |                                                                           |  |
| 1. Current Population                                                                                                                                                                                                     | Description of the size of the current population – e.g., number of people and where currently located. Use 1 if mentions population only and 2 if delves into where population located.                                                                                       | POPULATION   |                                                                           |  |
| 2. Future Population                                                                                                                                                                                                      | Description of the size of the future population – e.g., number of people and where they will be located. Use 1 if mentions population only and 2 if delves into where population will be located. This is a legislative requirement under the <i>Growth Plan – Schedule 3</i> |              |                                                                           |  |
| 3. Current Population Composition                                                                                                                                                                                         | Description of the composition of the current population – e.g., age breakdown and gender.                                                                                                                                                                                     |              |                                                                           |  |
| 4. Future Population Composition                                                                                                                                                                                          | Description of the composition of the future population – e.g., age breakdown and gender.                                                                                                                                                                                      |              |                                                                           |  |
| 5. Current Economy                                                                                                                                                                                                        | Description of the current economy of the municipality – e.g., main economic activities.                                                                                                                                                                                       |              | ECONOMY                                                                   |  |
| 6. Future Economy                                                                                                                                                                                                         | Description of the future economy of the municipality – e.g., continued support for existing economic activities.                                                                                                                                                              |              |                                                                           |  |
| 7. Existing Land Uses (or Land Use Map)                                                                                                                                                                                   | Description of the existing land uses with accompanying land use map – e.g., residential, commercial, institutional, and parks and open space.                                                                                                                                 |              | LAND USE & LAND SUPPLY                                                    |  |
| 8. Current Land Supply for Future                                                                                                                                                                                         | Description of the current land supply for the future – e.g., the amount of developable land available.                                                                                                                                                                        |              |                                                                           |  |
| 9. Existing Community Facilities                                                                                                                                                                                          | Description of the existing community facilities – e.g., community centers, parks, trails and open spaces.                                                                                                                                                                     |              | COMMUNITY FACILITIES AND INFRASTRUCTURE TO SERVICE POPULATION AND ECONOMY |  |
| 10. Future Need for Community Facilities                                                                                                                                                                                  | Description of the future need for community facilities – e.g., community centers, parks and open spaces.                                                                                                                                                                      |              |                                                                           |  |
